# Supplementary material for: Calcium-peroxide-mediated cascades of oxygen production and glutathione consumption induced efficient photodynamic and photothermal synergistic therapy
Source: Royal Society of Chemistry journal article supplement (doi:10.1039/d2tb02776c), 2023-01-01
Supplement: d2tb02776c1.pdf [file d2tb02776c1.pdf]

## *Supporting Information*

### **Calcium-peroxide-mediated cascades of oxygen production and glutathione consumption induced efficient photodynamic and photothermal synergistic therapy**

Lanfang Zhang <sup>a#</sup>, Hui Lu <sup>a#</sup>, Yu Tang <sup>a</sup>, Xiaojie Lu <sup>a</sup>, Zhendong Zhang <sup>a</sup>, Yan Zhang <sup>a</sup>, Ying Liu <sup>b\*</sup>, Chenhui Wang <sup>a\*</sup>

*<sup>a</sup> Chongqing Key Laboratory of Natural Product Synthesis and Drug Research, School of Pharmaceutical Sciences, Chongqing University, 55 South Daxuecheng Road, Chongqing 401331, P. R. China*

*<sup>b</sup> Department of pharmacy, Fuwai Central China Cardiovascular Hospital & Central China Branch of National Center for Cardiovascular Diseases, Zhengzhou, Henan, 451464, P. R. China.*

# These authors contributed equally to this work.

\*Corresponding author.

E-mail address: [wangchenhui@cqu.edu.cn](mailto:wangchenhui@cqu.edu.cn)

## Results and Discussion

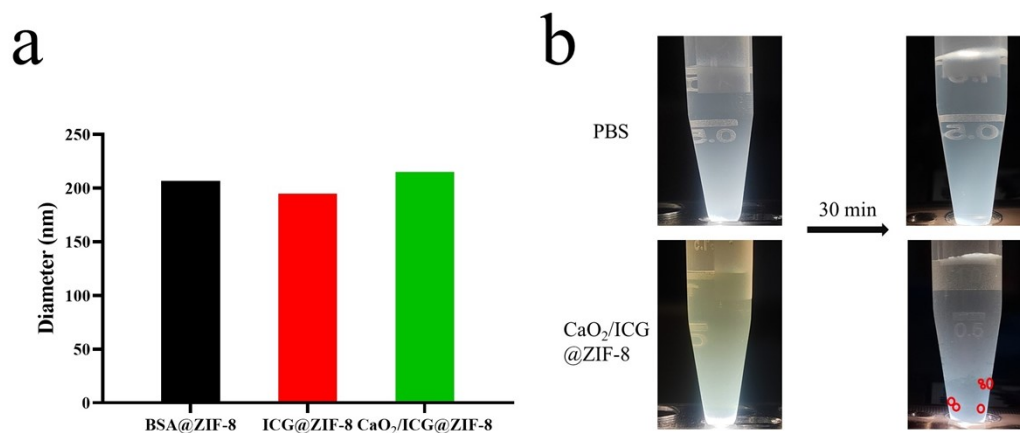

**Figure S1.** a) the hydrodynamic sizes of BSA@ZIF-8, ICG@ZIF-8 and CaO<sub>2</sub>/ICG@ZIF-8; b) the production of oxygen by CaO<sub>2</sub>/ICG@ZIF-8 in PBS (pH = 6.5).

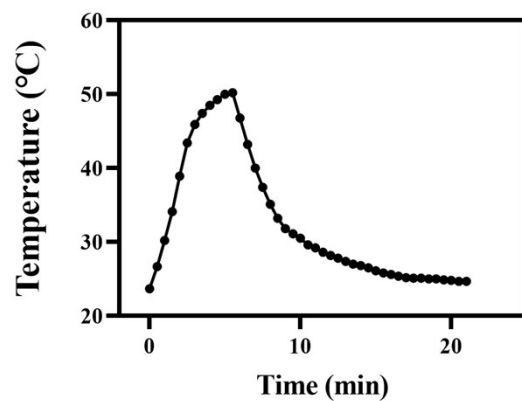

**Figure S2.** Photothermal response of the CaO<sub>2</sub>/ICG@ZIF-8 (containing 200 µg/mL) in aqueous solution with near infrared (NIR) laser (808 nm, 0.92 W/cm<sup>2</sup>), and then the laser was turned off.

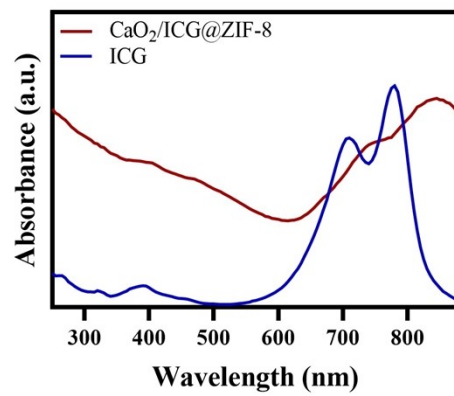

**Figure S3.** Ultraviolet-visible (UV-vis) absorbance spectrum of the  $\text{CaO}_2/\text{ICG}@Z\text{IF}-8$  and ICG.

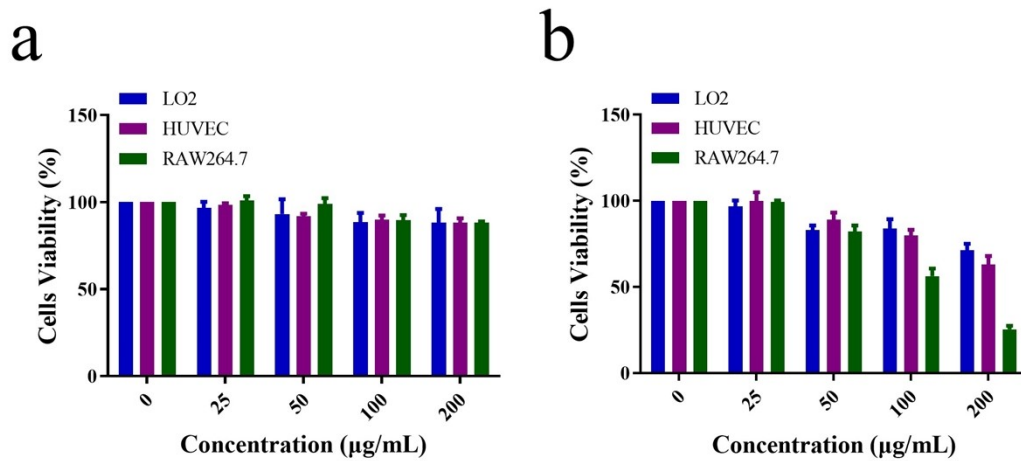

**Figure S4.** In vitro cytotoxicity of a)  $\text{BSA}@Z\text{IF}-8$  and b)  $\text{CaO}_2/\text{ICG}@Z\text{IF}-8$  on different cells in the absence of laser irradiation.

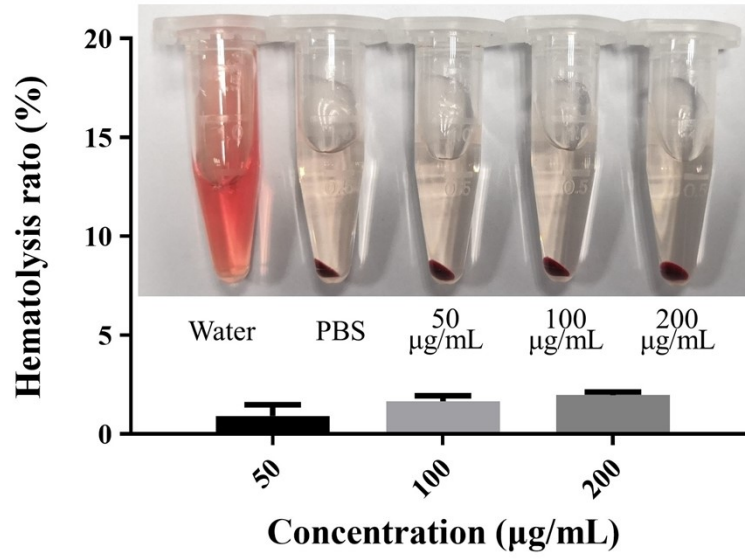

**Figure S5.** Hemolysis ratio of CaO<sub>2</sub>/ICG@ZIF-8 at different concentrations. The inset shows the corresponding hemolysis images.

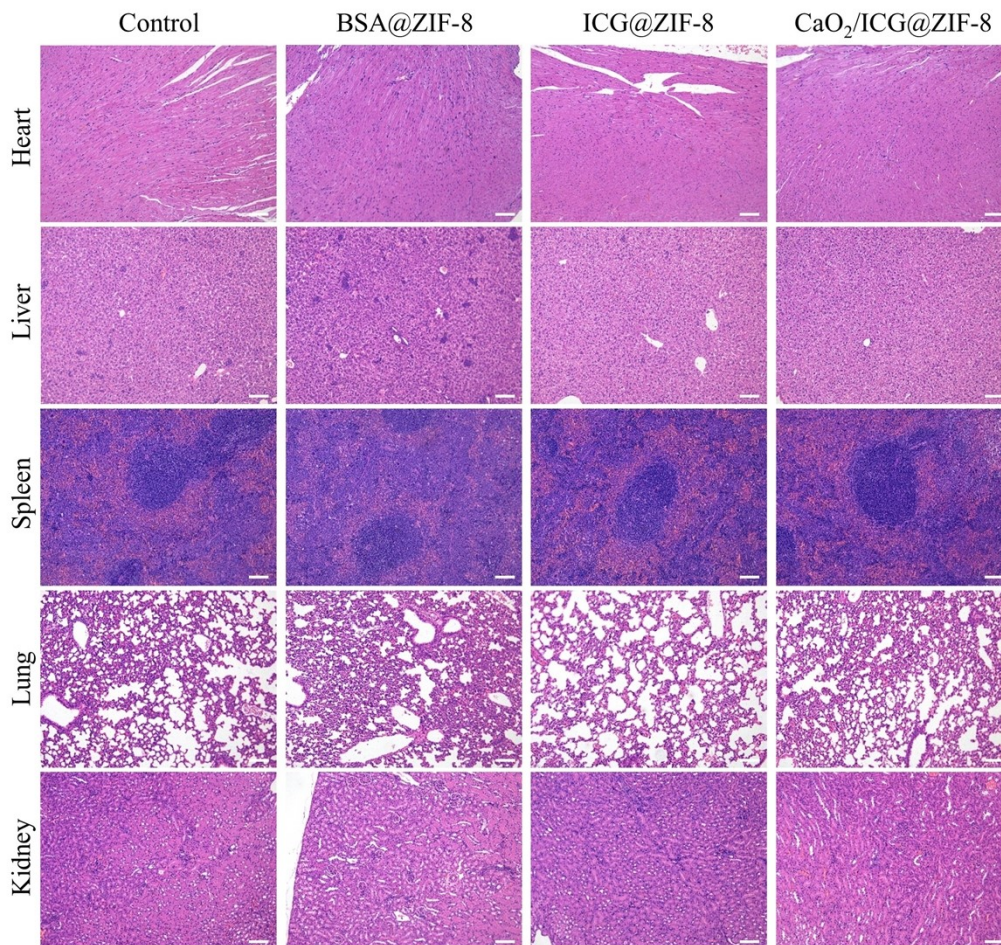

**Figure S6.** H&E-staining of heart, liver, spleen, lung, and kidney of the mice.

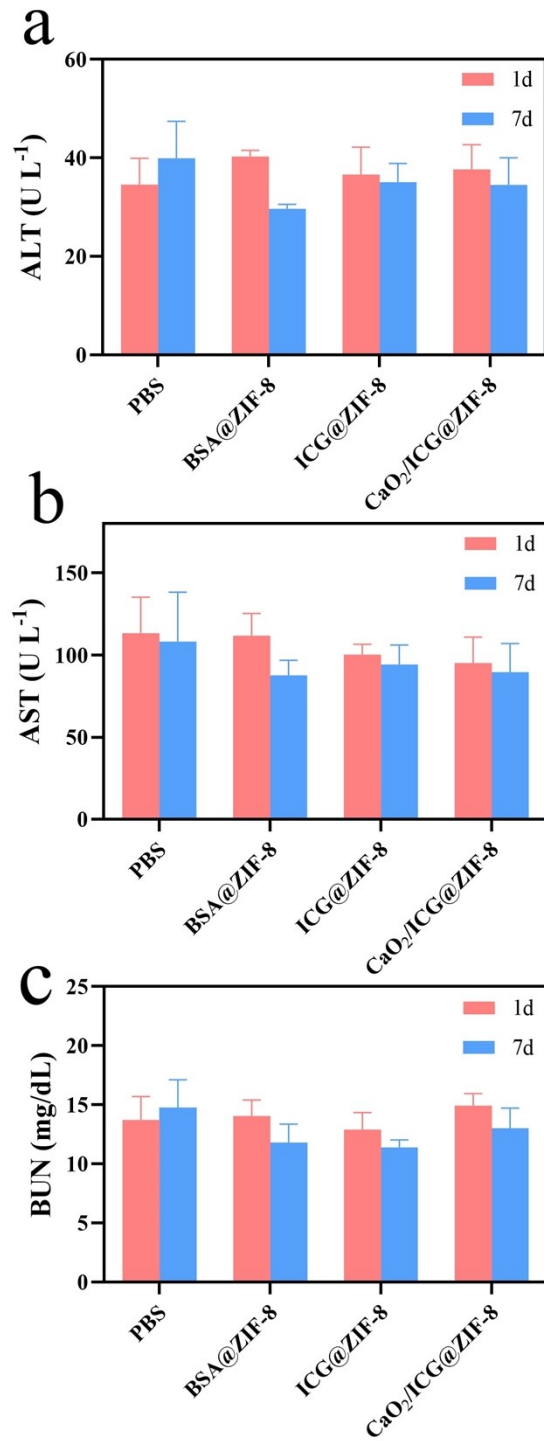

**Figure S7.** The analysis of a) ALT b) AST and c) BUN test on the blood samples collected from the mice. The normal range: ALT: 10.06-96.47 U/L; AST: 36.31-235.48 U/L; BUN: 10.81-34.74 mg/dL.
